# Supplementary material
Source: PubMed Central journal article supplement (PMC5432410)
Supplement: NIHMS836935-supplement-supplemental_tables.pdf [file NIHMS836935-supplement-supplemental_tables.pdf]

**Supplemental Table 1: Characteristics of the Study Participants, the Tennessee Colorectal Polyp Study. Sessile Serrated Polyps Only case group is limited to Sessile Serrated Polyp cases without a synchronous conventional adenoma.**

| Characteristic                                       | No-polyp Controls<br>n=3851 | Hyperplastic Polyps<br>n=560 | Conventional Adenomas<br>n=1779 | Sessile Serrated Polyps Only<br>n=123 | $P_{\text{heterogeneity}}$ |
|------------------------------------------------------|-----------------------------|------------------------------|---------------------------------|---------------------------------------|----------------------------|
| Study Site of Procedure <sup>a</sup>                 |                             |                              |                                 |                                       | 0.06                       |
| Vanderbilt University MC                             | 74.8                        | 70.0                         | 74.4                            | 76.0                                  |                            |
| VA-Nashville Campus                                  | 25.2                        | 30.0                         | 25.6                            | 24.0                                  |                            |
| Age (years)                                          | 57.2 ± 7.7                  | 56.8 ± 7.17                  | 59.0 ± 7.46                     | 57.8 ± 7.7                            | <0.001                     |
| Sex (% Female)                                       | 44.8                        | 36.4                         | 27.5                            | 62.6                                  | <0.001                     |
| Race (% Caucasian)                                   | 87.0                        | 89.3                         | 86.9                            | 89.9                                  | 0.34                       |
| Family History of Colorectal Cancer (%) <sup>a</sup> | 9.04                        | 8.6                          | 9.4                             | 11.4                                  | 0.60                       |
| Indication for Colonoscopy (%) <sup>a</sup>          |                             |                              |                                 |                                       | 0.29                       |
| Average Risk Screening                               | 56.9                        | 54.3                         | 55.7                            | 59.1                                  |                            |
| Family History of Colorectal Cancer                  | 12.6                        | 13.7                         | 12.5                            | 17.2                                  |                            |
| Diagnostic/Follow Up                                 | 22.7                        | 21.6                         | 23.6                            | 14.4                                  |                            |
| Other                                                | 7.8                         | 10.4                         | 8.2                             | 9.3                                   |                            |
| Educational Attainment (%) <sup>a</sup>              |                             |                              |                                 |                                       | <0.001                     |
| High School or Less                                  | 23.4                        | 29.5                         | 28.3                            | 24.2                                  |                            |
| Some College                                         | 28.4                        | 28.3                         | 28.5                            | 31.1                                  |                            |
| College Graduate                                     | 21.4                        | 21.9                         | 22.1                            | 29.7                                  |                            |
| Graduate/Professional School                         | 26.8                        | 20.3                         | 21.1                            | 15.0                                  |                            |
| Household Income <sup>a</sup>                        |                             |                              |                                 |                                       | 0.002                      |
| Under \$15,000                                       | 7.8                         | 9.6                          | 10.6                            | 5.0                                   |                            |
| \$15,001-\$30,000                                    | 14.1                        | 17.9                         | 16.2                            | 20.8                                  |                            |
| \$30,001-\$50,000                                    | 20.4                        | 17.2                         | 19.8                            | 23.3                                  |                            |
| Over \$50,000                                        | 57.7                        | 55.3                         | 53.4                            | 50.9                                  |                            |
| Daily Energy Intake (kcal) <sup>a</sup>              | 1846                        | 1938                         | 1914                            | 1824                                  | 0.01                       |

<sup>a</sup> Standardized by age (using ages grouped into 5 year categories starting at age 40) and sex.

**Supplemental Table 2: Associations between Modifiable Non-Dietary Factors and Polyp Risk; the Tennessee Colorectal Polyp Study. Sessile Serrated Polyps Only case group is limited to Sessile Serrated Polyp cases without a synchronous conventional adenoma.**

| Risk Factor                                                 | Case-Control Comparisons |     |                          |  |                            |                          | Case-Case Comparisons               |                          |                   |                          |                   |                   |                   |
|-------------------------------------------------------------|--------------------------|-----|--------------------------|--|----------------------------|--------------------------|-------------------------------------|--------------------------|-------------------|--------------------------|-------------------|-------------------|-------------------|
|                                                             | No polyp Controls        |     | Hyperplastic Polyps (HP) |  | Conventional Adenomas (AD) |                          | Sessile Serrated Polyps Only (SSPO) |                          | AD vs. HP         | SSPO vs. HP              | SSPO vs. AD       |                   |                   |
|                                                             | n                        | n   | OR (95% CI) <sup>a</sup> |  | n                          | OR (95% CI) <sup>a</sup> |                                     | OR (95% CI) <sup>a</sup> |                   | OR (95% CI) <sup>a</sup> |                   |                   |                   |
| <b>Cigarette Smoking Status<sup>b</sup></b>                 |                          |     |                          |  |                            |                          |                                     |                          |                   |                          |                   |                   |                   |
| Never                                                       | 2042                     | 170 | 1.00 (ref)               |  | 685                        | 1.00 (ref)               |                                     | 48                       | 1.00 (ref)        |                          | 1.00 (ref)        | 1.00 (ref)        | 1.00 (ref)        |
| Former                                                      | 1313                     | 215 | 2.10 (1.67, 2.64)        |  | 655                        | 1.29 (1.11, 1.49)        |                                     | 40                       | 1.46 (0.91, 2.36) |                          | 0.61 (0.48, 0.79) | 0.70 (0.42, 1.17) | 1.14 (0.70, 1.85) |
| Current                                                     | 490                      | 175 | 4.59 (3.53, 5.97)        |  | 437                        | 2.47 (2.06, 2.95)        |                                     | 34                       | 3.94 (2.34, 6.65) |                          | 0.54 (0.41, 0.71) | 0.86 (0.49, 1.51) | 1.60 (0.94, 2.71) |
| <b>P<sub>trend</sub></b>                                    |                          |     | <0.001                   |  |                            | <0.001                   |                                     |                          | <0.001            |                          |                   | 0.55              | 0.09              |
| <b>Cigarette Smoking Duration (years)<sup>b</sup></b>       |                          |     |                          |  |                            |                          |                                     |                          |                   |                          |                   |                   |                   |
| Never                                                       | 2042                     | 170 | 1.00 (ref)               |  | 685                        | 1.00 (ref)               |                                     | 48                       | 1.00 (ref)        |                          | 1.00 (ref)        | 1.00 (ref)        | 1.00 (ref)        |
| 1-15                                                        | 559                      | 61  | 1.45 (1.05, 1.99)        |  | 207                        | 1.08 (0.88, 1.31)        |                                     | 16                       | 1.27 (0.67, 2.42) |                          | 0.74 (0.53, 1.05) | 0.88 (0.44, 1.77) | 1.19 (0.62, 2.28) |
| 15-25                                                       | 353                      | 71  | 2.61 (1.90, 3.58)        |  | 166                        | 1.26 (1.01, 1.57)        |                                     | 12                       | 1.50 (0.73, 3.08) |                          | 0.48 (0.34, 0.68) | 0.57 (0.27, 1.23) | 1.19 (0.58, 2.47) |
| 25-35                                                       | 392                      | 92  | 3.10 (2.31, 4.16)        |  | 252                        | 1.84 (1.51, 2.25)        |                                     | 24                       | 3.24 (1.87, 5.62) |                          | 0.59 (0.43, 0.81) | 1.05 (0.58, 1.91) | 1.76 (1.01, 3.08) |
| >35                                                         | 498                      | 166 | 4.73 (3.59, 6.23)        |  | 462                        | 2.28 (1.91, 2.73)        |                                     | 21                       | 2.59 (1.42, 4.72) |                          | 0.48 (0.36, 0.64) | 0.55 (0.29, 1.04) | 1.14 (0.62, 2.08) |
| <b>P<sub>trend</sub></b>                                    |                          |     | <0.001                   |  |                            | <0.001                   |                                     |                          | <0.001            |                          |                   | 0.16              | 0.28              |
| <b>Cigarette Smoking Intensity (pack-years)<sup>b</sup></b> |                          |     |                          |  |                            |                          |                                     |                          |                   |                          |                   |                   |                   |
| Never                                                       | 2042                     | 170 | 1.00 (ref)               |  | 685                        | 1.00 (ref)               |                                     | 48                       | 1.00 (ref)        |                          | 1.00 (ref)        | 1.00 (ref)        | 1.00 (ref)        |
| 1-9                                                         | 588                      | 83  | 1.94 (1.45, 2.58)        |  | 239                        | 1.31 (1.08, 1.58)        |                                     | 20                       | 1.59 (0.89, 2.85) |                          | 0.68 (0.50, 0.92) | 0.82 (0.44, 1.55) | 1.22 (0.67, 2.20) |
| 10-29                                                       | 588                      | 142 | 3.12 (2.41, 4.04)        |  | 297                        | 1.31 (1.09, 1.58)        |                                     | 19                       | 1.71 (0.95, 3.07) |                          | 0.42 (0.32, 0.56) | 0.55 (0.30, 1.02) | 1.30 (0.72, 2.36) |
| ≥30                                                         | 651                      | 164 | 3.18 (2.43, 4.16)        |  | 549                        | 2.10 (1.78, 2.49)        |                                     | 34                       | 3.04 (1.78, 5.2)  |                          | 0.66 (0.50, 0.88) | 0.95 (0.53, 1.70) | 1.45 (0.84, 2.48) |
| <b>P<sub>trend</sub></b>                                    |                          |     | <0.001                   |  |                            | <0.001                   |                                     |                          | <0.001            |                          |                   | 0.60              | 0.18              |
| <b>Recency of Cigarette Smoking (years)<sup>b</sup></b>     |                          |     |                          |  |                            |                          |                                     |                          |                   |                          |                   |                   |                   |

| Risk Factor                                             | Case-Control Comparisons |     |                          |     |                            |    |                                     |                          | Case-Case Comparisons    |                          |             |
|---------------------------------------------------------|--------------------------|-----|--------------------------|-----|----------------------------|----|-------------------------------------|--------------------------|--------------------------|--------------------------|-------------|
|                                                         | No polyp Controls        |     | Hyperplastic Polyps (HP) |     | Conventional Adenomas (AD) |    | Sessile Serrated Polyps Only (SSPO) |                          | AD vs. HP                | SSPO vs. HP              | SSPO vs. AD |
|                                                         | n                        | n   | OR (95% CI) <sup>a</sup> | n   | OR (95% CI) <sup>a</sup>   | n  | OR (95% CI) <sup>a</sup>            | OR (95% CI) <sup>a</sup> | OR (95% CI) <sup>a</sup> | OR (95% CI) <sup>a</sup> |             |
| Current                                                 | 490                      | 175 | 1.00 (ref)               | 437 | 1.00 (ref)                 | 34 | 1.00 (ref)                          | 1.00 (ref)               | 1.00 (ref)               | 1.00 (ref)               |             |
| Quit <10                                                | 245                      | 63  | 0.67 (0.48, 0.94)        | 158 | 0.71 (0.55, 0.92)          | 8  | 0.43 (0.19, 0.95)                   | 1.06 (0.74, 1.51)        | 0.63 (0.27, 1.46)        | 0.60 (0.27, 1.34)        |             |
| Quit 10-20                                              | 307                      | 69  | 0.64 (0.46, 0.88)        | 174 | 0.59 (0.47, 0.76)          | 10 | 0.42 (0.2, 0.92)                    | 0.93 (0.66, 1.32)        | 0.67 (0.30, 1.49)        | 0.71 (0.33, 1.55)        |             |
| Quit >20                                                | 761                      | 83  | 0.29 (0.22, 0.40)        | 323 | 0.42 (0.34, 0.52)          | 22 | 0.33 (0.18, 0.61)                   | 1.43 (1.04, 1.98)        | 1.12 (0.57, 2.19)        | 0.78 (0.41, 1.47)        |             |
| Never                                                   | 2042                     | 170 | 0.21 (0.16, 0.27)        | 685 | 0.40 (0.33, 0.48)          | 48 | 0.25 (0.15, 0.42)                   | 1.89 (1.43, 2.49)        | 1.19 (0.68, 2.09)        | 0.63 (0.37, 1.07)        |             |
| <b>P<sub>trend</sub></b>                                |                          |     | <0.001                   |     | <0.001                     |    | <0.001                              | <0.001                   | 0.36                     | 0.16                     |             |
| <b>Regular Alcohol Use<sup>b,c</sup></b>                |                          |     |                          |     |                            |    |                                     |                          |                          |                          |             |
| Never                                                   | 2286                     | 284 | 1.00 (ref)               | 893 | 1.00 (ref)                 |    | 1.00 (ref)                          | 1.00 (ref)               | 1.00 (ref)               | 1.00 (ref)               |             |
| Former                                                  | 831                      | 145 | 0.87 (0.68, 1.11)        | 505 | 1.02 (0.87, 1.20)          | 31 | 1.17 (0.71, 1.95)                   | 1.17 (0.9, 1.51)         | 1.35 (0.78, 2.32)        | 1.15 (0.69, 1.92)        |             |
| Current                                                 | 720                      | 130 | 1.12 (0.88, 1.43)        | 378 | 1.03 (0.87, 1.21)          | 30 | 1.19 (0.7, 2)                       | 0.92 (0.71, 1.19)        | 1.06 (0.61, 1.85)        | 1.15 (0.68, 1.96)        |             |
| <b>P<sub>trend</sub></b>                                |                          |     | 0.49                     |     | 0.74                       |    | 0.49                                | 0.68                     | 0.74                     | 0.57                     |             |
| <b>Body Mass Index (kg/m<sup>2</sup>)<sup>b,c</sup></b> |                          |     |                          |     |                            |    |                                     |                          |                          |                          |             |
| 18.0-24.9                                               | 1201                     | 143 | 1.00 (ref)               | 446 | 1.00 (ref)                 | 34 | 1.00 (ref)                          | 1.00 (ref)               | 1.00 (ref)               | 1.00 (ref)               |             |
| 25.0-29.9                                               | 1443                     | 201 | 1.06 (0.83, 1.35)        | 710 | 1.13 (0.97, 1.33)          | 47 | 1.24 (0.75, 2.04)                   | 1.07 (0.83, 1.39)        | 1.17 (0.69, 2.00)        | 1.09 (0.66, 1.81)        |             |
| >30.0                                                   | 1189                     | 215 | 1.49 (1.17, 1.89)        | 611 | 1.33 (1.13, 1.57)          | 41 | 1.41 (0.84, 2.36)                   | 0.90 (0.69, 1.16)        | 0.95 (0.55, 1.65)        | 1.06 (0.63, 1.79)        |             |
| <b>P<sub>trend</sub></b>                                |                          |     | <0.001                   |     | <0.001                     |    | 0.19                                | 0.33                     | 0.79                     | 0.84                     |             |
| <b>Regular Exercise<sup>b,c</sup></b>                   |                          |     |                          |     |                            |    |                                     |                          |                          |                          |             |
| No                                                      | 1606                     | 266 | 1.00 (ref)               | 863 | 1.00 (ref)                 |    | 1.00 (ref)                          | 1.00 (ref)               | 1.00 (ref)               | 1.00 (ref)               |             |
| Yes                                                     | 2245                     | 294 | 0.95 (0.78, 1.16)        | 916 | 0.90 (0.79, 1.02)          |    | 0.94 (0.76, 1.16)                   | 0.94 (0.76, 1.16)        | 1.04 (0.67, 1.60)        | 1.10 (0.73, 1.66)        |             |
| <b>P<sub>trend</sub></b>                                |                          |     | 0.64                     |     | 0.10                       |    | 0.56                                | 0.56                     | 0.88                     | 0.65                     |             |

| Risk Factor                                                          | Case-Control Comparisons |     |                          |  |                            |                          |                                     |    | Case-Case Comparisons    |             |                          |                          |                          |
|----------------------------------------------------------------------|--------------------------|-----|--------------------------|--|----------------------------|--------------------------|-------------------------------------|----|--------------------------|-------------|--------------------------|--------------------------|--------------------------|
|                                                                      | No polyp Controls        |     | Hyperplastic Polyps (HP) |  | Conventional Adenomas (AD) |                          | Sessile Serrated Polyps Only (SSPO) |    | AD vs. HP                | SSPO vs. HP | SSPO vs. AD              |                          |                          |
|                                                                      | n                        | n   | OR (95% CI) <sup>a</sup> |  | n                          | OR (95% CI) <sup>a</sup> |                                     | n  | OR (95% CI) <sup>a</sup> |             | OR (95% CI) <sup>a</sup> | OR (95% CI) <sup>a</sup> | OR (95% CI) <sup>a</sup> |
| <b>Regular Exercise Intensity (MET hours per week)<sup>b,c</sup></b> |                          |     |                          |  |                            |                          |                                     |    |                          |             |                          |                          |                          |
| 0.1-10.5                                                             | 558                      | 80  | 1.00 (ref)               |  | 235                        | 1.00 (ref)               |                                     | 14 | 1.00 (ref)               |             | 1.00 (ref)               | 1.00 (ref)               | 1.00 (ref)               |
| 10.5-21.0                                                            | 565                      | 73  | 0.99 (0.70, 1.41)        |  | 248                        | 1.06 (0.84, 1.34)        |                                     | 19 | 1.02 (0.44, 2.34)        |             | 1.07 (0.73, 1.56)        | 1.03 (0.43, 2.48)        | 0.96 (0.41, 2.23)        |
| 21.0-36.2                                                            | 558                      | 71  | 0.90 (0.63, 1.29)        |  | 208                        | 0.92 (0.72, 1.17)        |                                     | 22 | 2.09 (1.01, 4.32)        |             | 1.02 (0.69, 1.51)        | 2.33 (1.06, 5.08)        | 2.28 (1.09, 4.76)        |
| >36.2                                                                | 563                      | 68  | 0.84 (0.58, 1.21)        |  | 222                        | 0.92 (0.72, 1.17)        |                                     | 15 | 1.16 (0.52, 2.62)        |             | 1.10 (0.74, 1.63)        | 1.39 (0.59, 3.29)        | 1.26 (0.56, 2.87)        |
| <b>P<sub>trend</sub></b>                                             |                          |     | 0.29                     |  |                            | 0.32                     |                                     |    | 0.32                     |             | 0.71                     | 0.16                     | 0.19                     |
| <b>Regular NSAID Use<sup>c</sup></b>                                 |                          |     |                          |  |                            |                          |                                     |    |                          |             |                          |                          |                          |
| Never                                                                | 1698                     | 241 | 1.00 (ref)               |  | 744                        | 1.00 (ref)               |                                     | 56 | 1.00 (ref)               |             | 1.00 (ref)               | 1.00 (ref)               | 1.00 (ref)               |
| Former                                                               | 245                      | 33  | 0.89 (0.60, 1.33)        |  | 108                        | 0.97 (0.75, 1.25)        |                                     | 9  | 1.08 (0.52, 2.24)        |             | 1.08 (0.71, 1.65)        | 1.21 (0.54, 2.69)        | 1.11 (0.53, 2.34)        |
| Current                                                              | 1881                     | 267 | 0.92 (0.75, 1.12)        |  | 784                        | 0.79 (0.69, 0.90)        |                                     | 46 | 0.69 (0.46, 1.05)        |             | 0.86 (0.70, 1.06)        | 0.75 (0.48, 1.18)        | 0.88 (0.58, 1.34)        |
| <b>P<sub>trend</sub></b>                                             |                          |     | 0.41                     |  |                            | <0.001                   |                                     |    | 0.09                     |             | 0.16                     | 0.22                     | 0.56                     |
| <b>Duration of Regular NSAID Use (years)<sup>c</sup></b>             |                          |     |                          |  |                            |                          |                                     |    |                          |             |                          |                          |                          |
| 0-<1                                                                 | 1698                     | 241 | 1.00 (ref)               |  | 744                        | 1.00 (ref)               |                                     | 56 | 1.00 (ref)               |             | 1.00 (ref)               | 1.00 (ref)               | 1.00 (ref)               |
| 1-5                                                                  | 979                      | 122 | 0.83 (0.65, 1.05)        |  | 374                        | 0.78 (0.67, 0.91)        |                                     | 26 | 0.80 (0.49, 1.30)        |             | 0.94 (0.73, 1.22)        | 0.97 (0.58, 1.64)        | 1.03 (0.63, 1.68)        |
| 6-10                                                                 | 618                      | 106 | 1.11 (0.86, 1.44)        |  | 272                        | 0.85 (0.71, 1.02)        |                                     | 18 | 0.81 (0.46, 1.42)        |             | 0.77 (0.58, 1.01)        | 0.73 (0.40, 1.33)        | 0.95 (0.54, 1.69)        |
| >10                                                                  | 529                      | 73  | 0.86 (0.64, 1.16)        |  | 246                        | 0.82 (0.68, 0.99)        |                                     | 11 | 0.54 (0.27, 1.09)        |             | 0.95 (0.70, 1.29)        | 0.63 (0.30, 1.32)        | 0.66 (0.33, 1.34)        |
| <b>P<sub>trend</sub></b>                                             |                          |     | 0.70                     |  |                            | 0.02                     |                                     |    | 0.09                     |             | 0.28                     | 0.15                     | 0.32                     |
| <b>Dose of Regular NSAID Use (times per week)<sup>c</sup></b>        |                          |     |                          |  |                            |                          |                                     |    |                          |             |                          |                          |                          |
| 0                                                                    | 1588                     | 242 | 1.00 (ref)               |  | 832                        | 1.00 (ref)               |                                     |    | 1.00 (ref)               |             | 1.00 (ref)               | 1.00 (ref)               | 1.00 (ref)               |
| <7                                                                   | 304                      | 45  | 1.01 (0.71, 1.45)        |  | 106                        | 0.80 (0.62, 1.04)        |                                     |    | 0.80 (0.62, 1.04)        |             | 0.79 (0.53, 1.17)        | 0.67 (0.28, 1.58)        | 0.85 (0.37, 1.93)        |
| 7                                                                    | 965                      | 137 | 0.95 (0.75, 1.22)        |  | 453                        | 0.85 (0.72, 1.00)        |                                     |    | 0.85 (0.72, 1.00)        |             | 0.89 (0.69, 1.15)        | 0.89 (0.52, 1.52)        | 1.00 (0.60, 1.65)        |

| Risk Factor        | Case-Control Comparisons |     |                          |  |                            |                          | Case-Case Comparisons               |                          |                          |                          |                          |
|--------------------|--------------------------|-----|--------------------------|--|----------------------------|--------------------------|-------------------------------------|--------------------------|--------------------------|--------------------------|--------------------------|
|                    | No polyp Controls        |     | Hyperplastic Polyps (HP) |  | Conventional Adenomas (AD) |                          | Sessile Serrated Polyps Only (SSPO) |                          | AD vs. HP                | SSPO vs. HP              | SSPO vs. AD              |
|                    | n                        | n   | OR (95% CI) <sup>a</sup> |  | n                          | OR (95% CI) <sup>a</sup> | n                                   | OR (95% CI) <sup>a</sup> |
| >7                 | 994                      | 136 | 0.86 (0.67, 1.09)        |  | 388                        | 0.77 (0.66, 0.91)        | 0.77 (0.66, 0.91)                   |                          | 0.90 (0.70, 1.17)        | 0.78 (0.44, 1.36)        | 0.86 (0.51, 1.46)        |
| P <sub>trend</sub> |                          |     | 0.23                     |  |                            | 0.001                    | 0.001                               |                          | 0.37                     | 0.39                     | 0.65                     |

<sup>a</sup> Derived from multinomial logistic regression models which included all case and controls groups and adjusted for age (40-49, 50-59, 60-64, and 65+ years of age), sex, educational attainment, year of colonoscopy, and study site

<sup>b</sup> Additionally adjusted for NSAID use

<sup>c</sup> Additionally adjusted for cigarette smoking status

**Supplemental Table 3: Associations between Modifiable Dietary Factors and Polyp Risk; the Tennessee Colorectal Polyp Study. Sessile Serrated Polyps Only case group is limited to Sessile Serrated Polyp cases without a synchronous conventional adenoma.**

| Dietary Intake (per day)                           | Case-Control Comparisons |                          |                   |                            |                   |                                     | Case-Case Comparisons |                   |                   |                   |
|----------------------------------------------------|--------------------------|--------------------------|-------------------|----------------------------|-------------------|-------------------------------------|-----------------------|-------------------|-------------------|-------------------|
|                                                    | No polyp Controls        | Hyperplastic Polyps (HP) |                   | Conventional Adenomas (AD) |                   | Sessile Serrated Polyps Only (SSPO) |                       | AD vs. HP         | SSP vs. HP        | SSP vs. AD        |
|                                                    | n                        | n                        | OR (95% CI)       | n                          | OR (95% CI)       | n                                   | OR (95% CI)           | OR (95% CI)       | OR (95% CI)       | OR (95% CI)       |
| <b>Fiber (g)<sup>a</sup></b>                       |                          |                          |                   |                            |                   |                                     |                       |                   |                   |                   |
| 2.91-12.88                                         | 813                      | 114                      | 1.00 (ref)        | 375                        | 1.00 (ref)        | 30                                  | 1.00 (ref)            | 1.00 (ref)        | 1.00 (ref)        | 1.00 (ref)        |
| 12.88-17.79                                        | 811                      | 127                      | 1.02 (0.75, 1.39) | 319                        | 0.72 (0.59, 0.89) | 25                                  | 0.59 (0.31, 1.12)     | 0.71 (0.51, 0.98) | 0.58 (0.29, 1.15) | 0.82 (0.43, 1.57) |
| 17.79-24.73                                        | 811                      | 113                      | 0.81 (0.57, 1.16) | 380                        | 0.75 (0.59, 0.94) | 21                                  | 0.52 (0.25, 1.09)     | 0.92 (0.63, 1.33) | 0.64 (0.29, 1.41) | 0.70 (0.33, 1.47) |
| >24.73                                             | 811                      | 118                      | 0.71 (0.48, 1.06) | 428                        | 0.65 (0.50, 0.85) | 22                                  | 0.42 (0.18, 0.98)     | 0.92 (0.60, 1.39) | 0.59 (0.24, 1.45) | 0.64 (0.27, 1.51) |
| <b>P<sub>trend</sub></b>                           |                          |                          | 0.06              |                            | 0.005             |                                     | 0.049                 | 0.98              | 0.31              | 0.27              |
| <b>Dietary Folate Equivalents (µg)<sup>a</sup></b> |                          |                          |                   |                            |                   |                                     |                       |                   |                   |                   |
| 63.8-394.7                                         | 812                      | 119                      | 1.00 (ref)        | 369                        | 1.00 (ref)        | 29                                  | 1.00 (ref)            | 1.00 (ref)        | 1.00 (ref)        | 1.00 (ref)        |
| 394.7-572.6                                        | 811                      | 123                      | 0.88 (0.64, 1.22) | 348                        | 0.74 (0.60, 0.92) | 23                                  | 0.80 (0.41, 1.60)     | 0.84 (0.59, 1.18) | 0.91 (0.44, 1.89) | 1.09 (0.54, 2.18) |
| 572.6-811.8                                        | 811                      | 119                      | 0.68 (0.47, 0.98) | 380                        | 0.64 (0.50, 0.81) | 27                                  | 0.82 (0.39, 1.73)     | 0.94 (0.64, 1.37) | 1.21 (0.55, 2.68) | 1.29 (0.61, 2.73) |
| >811.8                                             | 812                      | 111                      | 0.53 (0.35, 0.80) | 405                        | 0.56 (0.43, 0.73) | 19                                  | 0.46 (0.19, 1.12)     | 1.04 (0.68, 1.61) | 0.87 (0.34, 2.22) | 0.83 (0.34, 2.02) |
| <b>P<sub>trend</sub></b>                           |                          |                          | 0.001             |                            | <0.001            |                                     | 0.11                  | 0.64              | 0.95              | 0.77              |
| <b>Calcium (mg)<sup>a</sup></b>                    |                          |                          |                   |                            |                   |                                     |                       |                   |                   |                   |
| 128.0-595.8                                        | 812                      | 118                      | 1.00 (ref)        | 370                        | 1.00 (ref)        | 31                                  | 1.00 (ref)            | 1.00 (ref)        | 1.00 (ref)        | 1.00 (ref)        |
| 595.8-837.8                                        | 811                      | 117                      | 0.91 (0.66, 1.26) | 342                        | 0.81 (0.65, 1.00) | 19                                  | 0.76 (0.38, 1.52)     | 0.88 (0.63, 1.24) | 0.83 (0.40, 1.74) | 0.95 (0.47, 1.90) |
| 837.8-1217                                         | 811                      | 112                      | 0.69 (0.48, 1.00) | 390                        | 0.69 (0.54, 0.89) | 27                                  | 0.85 (0.39, 1.83)     | 1.00 (0.67, 1.48) | 1.22 (0.53, 2.80) | 1.22 (0.56, 2.67) |
| >1217                                              | 812                      | 125                      | 0.66 (0.44, 1.00) | 400                        | 0.57 (0.44, 0.76) | 21                                  | 0.49 (0.20, 1.20)     | 0.87 (0.56, 1.33) | 0.74 (0.29, 1.92) | 0.86 (0.35, 2.12) |
| <b>P<sub>trend</sub></b>                           |                          |                          | 0.03              |                            | <0.001            |                                     | 0.15                  | 0.64              | 0.66              | 0.82              |
| <b>Fat (g)<sup>a</sup></b>                         |                          |                          |                   |                            |                   |                                     |                       |                   |                   |                   |

| Dietary Intake (per day)        | Case-Control Comparisons |                          |                   |                            |                   |                                     | Case-Case Comparisons |                   |                   |                    |
|---------------------------------|--------------------------|--------------------------|-------------------|----------------------------|-------------------|-------------------------------------|-----------------------|-------------------|-------------------|--------------------|
|                                 | No polyp Controls        | Hyperplastic Polyps (HP) |                   | Conventional Adenomas (AD) |                   | Sessile Serrated Polyps Only (SSPO) |                       | AD vs. HP         | SSP vs. HP        | SSP vs. AD         |
|                                 | n                        | n                        | OR (95% CI)       | n                          | OR (95% CI)       | n                                   | OR (95% CI)           | OR (95% CI)       | OR (95% CI)       | OR (95% CI)        |
| 11.91-48.00                     | 812                      | 91                       | 1.00 (ref)        | 299                        | 1.00 (ref)        | 23                                  | 1.00 (ref)            | 1.00 (ref)        | 1.00 (ref)        | 1.00 (ref)         |
| 48.00-68.06                     | 810                      | 110                      | 1.23 (0.85, 1.79) | 293                        | 0.85 (0.66, 1.09) | 20                                  | 1.44 (0.66, 3.15)     | 0.69 (0.46, 1.03) | 1.17 (0.50, 2.70) | 1.69 (0.76, 3.76)  |
| 68.06-98.16                     | 812                      | 126                      | 1.22 (0.77, 1.94) | 386                        | 0.89 (0.66, 1.21) | 24                                  | 2.56 (0.91, 7.22)     | 0.73 (0.44, 1.20) | 2.10 (0.70, 6.33) | 2.88 (1.01, 8.23)  |
| >98.16                          | 812                      | 145                      | 1.19 (0.69, 2.06) | 524                        | 0.97 (0.67, 1.39) | 31                                  | 3.11 (0.91, 10.60)    | 0.81 (0.45, 1.46) | 2.62 (0.71, 9.66) | 3.22 (0.93, 11.12) |
| <b>P<sub>trend</sub></b>        |                          |                          | 0.62              |                            | 0.99              |                                     | 0.07                  | 0.64              | 0.13              | 0.07               |
| <b>Red Meat (g)<sup>a</sup></b> |                          |                          |                   |                            |                   |                                     |                       |                   |                   |                    |
| 0-16.06                         | 811                      | 73                       | 1.00 (ref)        | 226                        | 1.00 (ref)        | 16                                  | 1.00 (ref)            | 1.00 (ref)        | 1.00 (ref)        | 1.00 (ref)         |
| 16.06-38.54                     | 809                      | 112                      | 1.53 (1.10, 2.12) | 358                        | 1.43 (1.15, 1.76) | 21                                  | 1.30 (0.62, 2.74)     | 0.93 (0.65, 1.33) | 0.85 (0.39, 1.89) | 0.91 (0.43, 1.94)  |
| 38.54-73.38                     | 807                      | 123                      | 1.52 (1.09, 2.12) | 360                        | 1.37 (1.10, 1.70) | 23                                  | 1.79 (0.87, 3.72)     | 0.90 (0.63, 1.30) | 1.19 (0.54, 2.59) | 1.31 (0.63, 2.75)  |
| >73.38                          | 808                      | 163                      | 1.68 (1.19, 2.37) | 552                        | 1.68 (1.35, 2.10) | 38                                  | 3.11 (1.49, 6.50)     | 1.00 (0.69, 1.45) | 1.85 (0.84, 4.08) | 1.85 (0.88, 3.91)  |
| <b>P<sub>trend</sub></b>        |                          |                          | 0.008             |                            | <0.001            |                                     | 0.001                 | 0.93              | 0.05              | 0.04               |

<sup>a</sup> Derived from multinomial logistic regression models which included all case and controls groups and adjusted for age based on categories (ages 40-49, 50-59, 60-64, and 65+) sex, educational attainment, year of colonoscopy, study site, cigarette use, NSAID use status, and total daily energy intake (divided into quartile categories based on kilocalories/day).

**Supplemental Table 4: Evaluation of Independent Associations between Modifiable Factors and Polyp Risk, the Tennessee Colorectal Polyp Study. Sessile Serrated Polyps Only case group is limited to Sessile Serrated Polyp cases without a synchronous conventional adenoma.**

| Factor                                            | No polyp Controls | Hyperplastic Polyps |                          | Conventional Adenomas |                          | Sessile Serrated Polyps Only |                          |
|---------------------------------------------------|-------------------|---------------------|--------------------------|-----------------------|--------------------------|------------------------------|--------------------------|
|                                                   | n                 | n                   | OR (95% CI) <sup>a</sup> | n                     | OR (95% CI) <sup>a</sup> | n                            | OR (95% CI) <sup>a</sup> |
| <b>Cigarette Smoking</b>                          |                   |                     |                          |                       |                          |                              |                          |
| Never                                             | 1774              | 147                 | 1.00 (ref)               | 596                   | 1.00 (ref)               | 39                           | 1.00 (ref)               |
| Former                                            | 1126              | 190                 | 2.22 (1.73, 2.85)        | 550                   | 1.23 (1.05, 1.44)        | 33                           | 1.43 (0.85, 2.40)        |
| Current                                           | 343               | 190                 | 5.03 (3.73, 6.79)        | 355                   | 2.69 (2.19, 3.30)        | 25                           | 3.87 (2.12, 7.05)        |
| P <sub>trend</sub>                                |                   |                     | <0.001                   |                       | <0.001                   |                              | <0.001                   |
| <b>Body Mass Index (kg/m<sup>2</sup>)</b>         |                   |                     |                          |                       |                          |                              |                          |
| 18.0 – 24.9                                       | 1049              | 120                 | 1.00 (ref)               | 389                   | 1.00 (ref)               | 28                           | 1.00 (ref)               |
| 25.0 – 29.9                                       | 1224              | 174                 | 1.04 (0.80, 1.36)        | 600                   | 1.06 (0.90, 1.26)        | 38                           | 1.19 (0.68, 2.07)        |
| >30                                               | 965               | 178                 | 1.41 (1.08, 1.86)        | 506                   | 1.22 (1.02, 1.47)        | 32                           | 1.14 (0.63, 2.06)        |
| P <sub>trend</sub>                                |                   |                     | 0.01                     |                       | 0.03                     |                              | 0.69                     |
| <b>Regular NSAID Use</b>                          |                   |                     |                          |                       |                          |                              |                          |
| Never                                             | 1438              | 197                 | 1.00 (ref)               | 633                   | 1.00 (ref)               | 41                           | 1.00 (ref)               |
| Former                                            | 206               | 29                  | 0.96 (0.62, 1.48)        | 88                    | 0.92 (0.69, 1.23)        | 6                            | 1.02 (0.42, 2.47)        |
| Current                                           | 1593              | 228                 | 0.90 (0.72, 1.12)        | 679                   | 0.77 (0.67, 0.89)        | 43                           | 0.86 (0.54, 1.37)        |
| P <sub>trend</sub>                                |                   |                     | 0.36                     |                       | <0.001                   |                              | 0.53                     |
| <b>Fiber Intake (g/day)</b>                       |                   |                     |                          |                       |                          |                              |                          |
| 2.91 – 12.88                                      | 813               | 114                 | 1.00 (ref)               | 375                   | 1.00 (ref)               | 30                           | 1.00 (ref)               |
| 12.88 – 17.79                                     | 811               | 127                 | 1.17 (0.83, 1.63)        | 319                   | 0.82 (0.65, 1.03)        | 25                           | 0.60 (0.30, 1.22)        |
| 17.79 – 24.73                                     | 811               | 113                 | 1.04 (0.70, 1.55)        | 380                   | 0.93 (0.71, 1.22)        | 21                           | 0.55 (0.24, 1.26)        |
| 24.73 – 126.3                                     | 811               | 118                 | 1.08 (0.67, 1.72)        | 428                   | 0.92 (0.68, 1.25)        | 22                           | 0.61 (0.23, 1.63)        |
| P <sub>trend</sub>                                |                   |                     | 0.92                     |                       | 0.85                     |                              | 0.31                     |
| <b>Dietary Folate Equivalents Intake (µg/day)</b> |                   |                     |                          |                       |                          |                              |                          |
| 63.81 – 394.7                                     | 812               | 119                 | 1.00 (ref)               | 369                   | 1.00 (ref)               | 29                           | 1.00 (ref)               |
| 394.7 – 572.6                                     | 811               | 123                 | 0.87 (0.61, 1.24)        | 348                   | 0.83 (0.65, 1.06)        | 23                           | 1.04 (0.49, 2.23)        |
| 572.6 – 811.8                                     | 811               | 119                 | 0.71 (0.47, 1.09)        | 380                   | 0.76 (0.57, 1.01)        | 27                           | 1.22 (0.51, 2.96)        |
| 811.8 - 4542                                      | 812               | 111                 | 0.59 (0.36, 0.98)        | 405                   | 0.72 (0.52, 1.01)        | 19                           | 0.81 (0.27, 2.41)        |

| Factor                                 | No polyp Controls | Hyperplastic Polyps |                          | Conventional Adenomas |                          | Sessile Serrated Polyps Only |                          |
|----------------------------------------|-------------------|---------------------|--------------------------|-----------------------|--------------------------|------------------------------|--------------------------|
|                                        | n                 | n                   | OR (95% CI) <sup>a</sup> | n                     | OR (95% CI) <sup>a</sup> | n                            | OR (95% CI) <sup>a</sup> |
| P <sub>trend</sub>                     |                   |                     | 0.03                     |                       | 0.06                     |                              | 0.82                     |
| <b>Dietary Calcium Intake (mg/day)</b> |                   |                     |                          |                       |                          |                              |                          |
| 128.0 – 595.8                          | 812               | 118                 | 1.00 (ref)               | 370                   | 1.00 (ref)               | 31                           | 1.00 (ref)               |
| 595.8 – 837.8                          | 811               | 117                 | 0.98 (0.70, 1.36)        | 342                   | 0.89 (0.71, 1.12)        | 19                           | 0.87 (0.42, 1.79)        |
| 837.8 – 1217                           | 811               | 112                 | 0.82 (0.55, 1.23)        | 390                   | 0.80 (0.61, 1.04)        | 27                           | 1.04 (0.45, 2.40)        |
| 1217 – 6880                            | 812               | 125                 | 0.85 (0.54, 1.33)        | 400                   | 0.68 (0.50, 0.91)        | 21                           | 0.68 (0.25, 1.80)        |
| P <sub>trend</sub>                     |                   |                     | 0.40                     |                       | 0.01                     |                              | 0.50                     |
| <b>Red Meat Intake (g/day)</b>         |                   |                     |                          |                       |                          |                              |                          |
| 0.0 – 16.07                            | 811               | 73                  | 1.00 (ref)               | 226                   | 1.00 (ref)               | 16                           | 1.00 (ref)               |
| 16.07 – 38.54                          | 809               | 112                 | 1.45 (1.04, 2.03)        | 358                   | 1.36 (1.10, 1.69)        | 21                           | 1.22 (0.58, 2.59)        |
| 38.54 – 73.88                          | 807               | 123                 | 1.39 (0.98, 1.95)        | 360                   | 1.26 (1.01, 1.57)        | 23                           | 1.60 (0.76, 3.37)        |
| 73.88 – 625.8                          | 808               | 163                 | 1.46 (1.02, 2.08)        | 552                   | 1.51 (1.20, 1.89)        | 38                           | 2.70 (1.26, 5.78)        |
| P <sub>trend</sub>                     |                   |                     | 0.10                     |                       | 0.003                    |                              | 0.005                    |

<sup>a</sup> Derived from multinomial logistic regression models which included all case and controls groups and adjusted for age (40-49, 50-59, 60-64, and 65+ years of age), sex, educational attainment, year of colonoscopy, study site, and total daily energy intake (divided into quartile categories based on kilocalories/day). Additionally adjusted for all variables within the table.
